# Supplementary material for: Effects of a 2-Week 5000 IU versus 1000 IU Vitamin D3 Supplementation on Recovery of Symptoms in Patients with Mild to Moderate Covid-19: A Randomized Clinical Trial
Source: MDPI journal article supplement (doi:10.3390/nu13072170), 2021-06-24
Supplement: s1 [file s1]

**Supplementary Table S1.** Baseline Serological Characteristics of Groups.

| Parameters                  | 1000 IU ( <i>n</i> = 33) | 5000 IU ( <i>n</i> = 36) | <i>p</i> -Value |
|-----------------------------|--------------------------|--------------------------|-----------------|
| <b>Complete Blood Count</b> |                          |                          |                 |
| Hemoglobin (g/L)            | 12.7 ± 1.8               | 13.0 ± 2.8               | 0.94            |
| Hematocrit (%)              | 38.5 ± 5.5               | 40.3 ± 5.7               | 0.56            |
| RBC count                   | 4.6 ± 0.6                | 4.8 ± 0.5                | 0.27            |
| WBC count #                 | 8.5 ± 1.0                | 6.9 ± 0.4                | 0.24            |
| Platelet count #            | 269 ± 29                 | 241 ± 16                 | 0.48            |
| Lymphocyte #                | 1.0 ± 0.1                | 2.4 ± 1.1                | 0.17            |
| Monocyte #                  | 0.5 ± 0.1                | 0.4 ± 0.0                | 0.67            |
| Eosinophil #                | 0.3 ± 0.1                | 0.1 ± 0.0                | 0.04            |
| Neutrophil #                | 6.2 ± 0.7                | 5.3 ± 0.5                | 0.34            |
| N/L ratio                   | 7.0 ± 1.0                | 5.8 ± 1.0                | 0.12            |
| Prothrombin Time            | 13.6 ± 1.6               | 13.1 ± 1.3               | 0.10            |
| APTT                        | 32.7 ± 4.8               | 31.9 ± 4.7               | 0.85            |
| INR                         | 1.2 ± 0.1                | 1.1 ± 0.1                | 0.10            |
| Bicarbonate (mEq/L)         | 20.8 ± 3.6               | 21.8 ± 2.7               | 0.16            |
| <b>Liver Profile</b>        |                          |                          |                 |
| Bilirubin #                 | 7.1 ± 1.2                | 9.1 ± 1.2                | 0.08            |
| Bilirubin (direct) #        | 4.1 ± 0.4                | 5.3 ± 0.6                | 0.03            |
| ALP (U/L) #                 | 97.5 ± 16.2              | 88.5 ± 11.0              | 0.29            |
| ALT (U/L) #                 | 62.1 ± 17.6              | 65.3 ± 14.6              | 0.51            |
| LDH (U/L) #                 | 564 ± 56                 | 487 ± 36                 | 0.50            |
| <b>Renal Profile</b>        |                          |                          |                 |
| Creatinine (μmol/L)         | 71.6 ± 16.2              | 67.0 ± 19.1              | 0.29            |
| Urea (mg/dL) #              | 9.1 ± 1.8                | 5.1 ± 0.5                | 0.01            |
| <b>Lipid Profile</b>        |                          |                          |                 |
| Triglycerides (mmol/L) #    | 1.5 ± 0.1                | 1.4 ± 0.1                | 0.38            |
| Total Cholesterol (mmol/L)  | 4.0 ± 1.4                | 4.0 ± 0.9                | 0.91            |
| HDL-Cholesterol (mmol/L)    | 1.0 ± 0.2                | 1.0 ± 0.3                | 0.17            |
| LDL-Cholesterol (mmol/L)    | 2.4 ± 1.2                | 2.3 ± 0.8                | 0.61            |
| <b>Inflammatory Markers</b> |                          |                          |                 |
| D-Dimer (μg/mL) #           | 3.4 ± 2.0                | 0.6 ± 0.1                | 0.02            |
| Ferritin (μg/mL) #          | 784 ± 112                | 733 ± 153                | 0.52            |
| CRP (mg/L) #                | 47.9 ± 6.8               | 33.7 ± 5.7               | 0.15            |
| IL-6 (pg/mL) #              | 23.9 ± 5.9               | 18.6 ± 4.6               | 0.67            |

|                             |            |            |      |
|-----------------------------|------------|------------|------|
| <b>Glycemic Profile</b>     |            |            |      |
| Fasting Glucose (mmol/L) #  | 10.3 ± 1.1 | 10.4 ± 1.1 | 0.83 |
| <b>Vitamin D</b>            |            |            |      |
| 25(OH)D (nmol/L) (75-250) # | 63.0 ± 2.5 | 53.4 ± 2.9 | 0.10 |

**Note:** Data presented as mean ± SD for normal variables while Mean ± SE for non-normal variables (#); Adjusted *p*-values obtained from mixed methods ANCOVA, adjusted for age, sex and BMI; N/L, neutrophil/lymphocyte; Significant at *p* < 0.05.
